# Supplementary material for: Using variation in arbuscular mycorrhizal fungi to drive the productivity of the food security crop cassava
Source: bioRxiv or medRxiv preprint supplement (doi:10.1101/830547), 2019-11-05
Supplement: Supplementary file [file media-4.pdf]

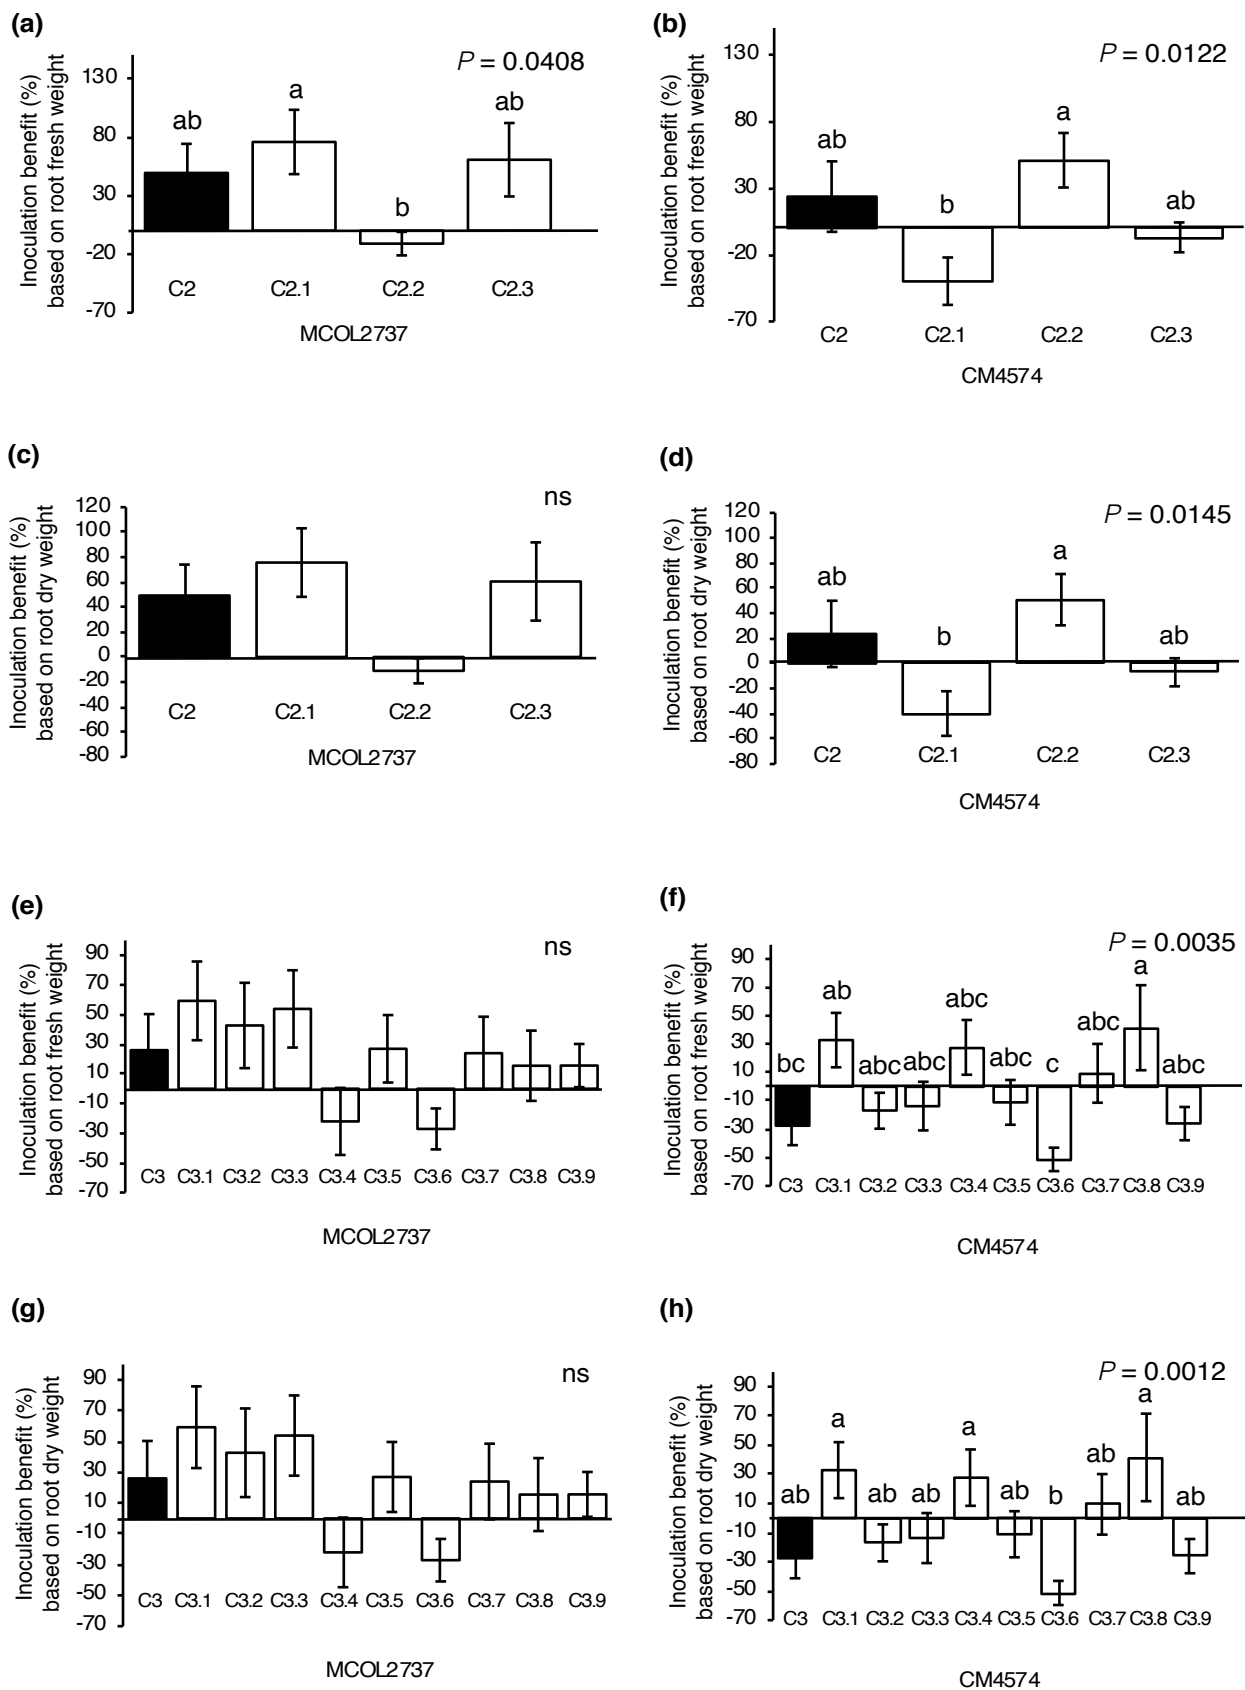

Supplementary figure 3. Inoculation benefit based on root fresh and dry weight of cassava cultivars MCOL2737 and CM4574 inoculated with the parental *R. irregularis* isolate C2 and its clonal progeny and the parental *R. irregularis* isolate C3 and its clonal progeny averaged over the two trials in experiment 4. Parental isolate treatments shown in black and progeny treatments unshaded. Bars represent +1 S.E. Different letters above bars represent significant differences ( $P \leq 0.05$ ) according to a Tukey honest significant difference test. See Supplementary table S4 for a summary of statistical analyses and Supplementary information for full details of all statistical tests.
