# Supplementary material for: Using variation in arbuscular mycorrhizal fungi to drive the productivity of the food security crop cassava
Source: bioRxiv or medRxiv preprint supplement (doi:10.1101/830547), 2019-11-05
Supplement: Supplementary file [file media-5.pdf]

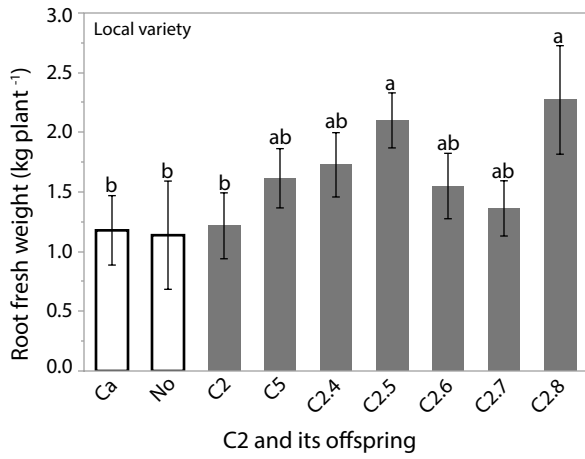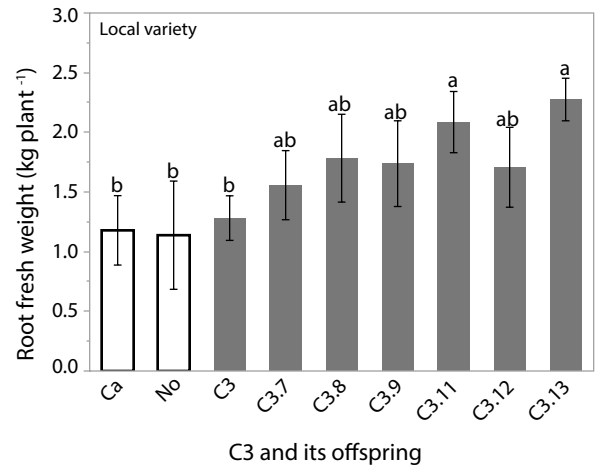

Supplementary figure 4. Root fresh weight of local cassava variety (Fumba Chai) inoculated with parental *R. irregularis* isolates C2, C5 and C3 and their offspring in Ukwala-Kawayo. Error bars represent  $\pm 1$  S.E. Different letters above bars represent significant differences at  $P \leq 0.05$ .
