# Supplementary material for: Using variation in arbuscular mycorrhizal fungi to drive the productivity of the food security crop cassava
Source: bioRxiv or medRxiv preprint supplement (doi:10.1101/830547), 2019-11-05
Supplement: Supplementary file [file media-8.pdf]

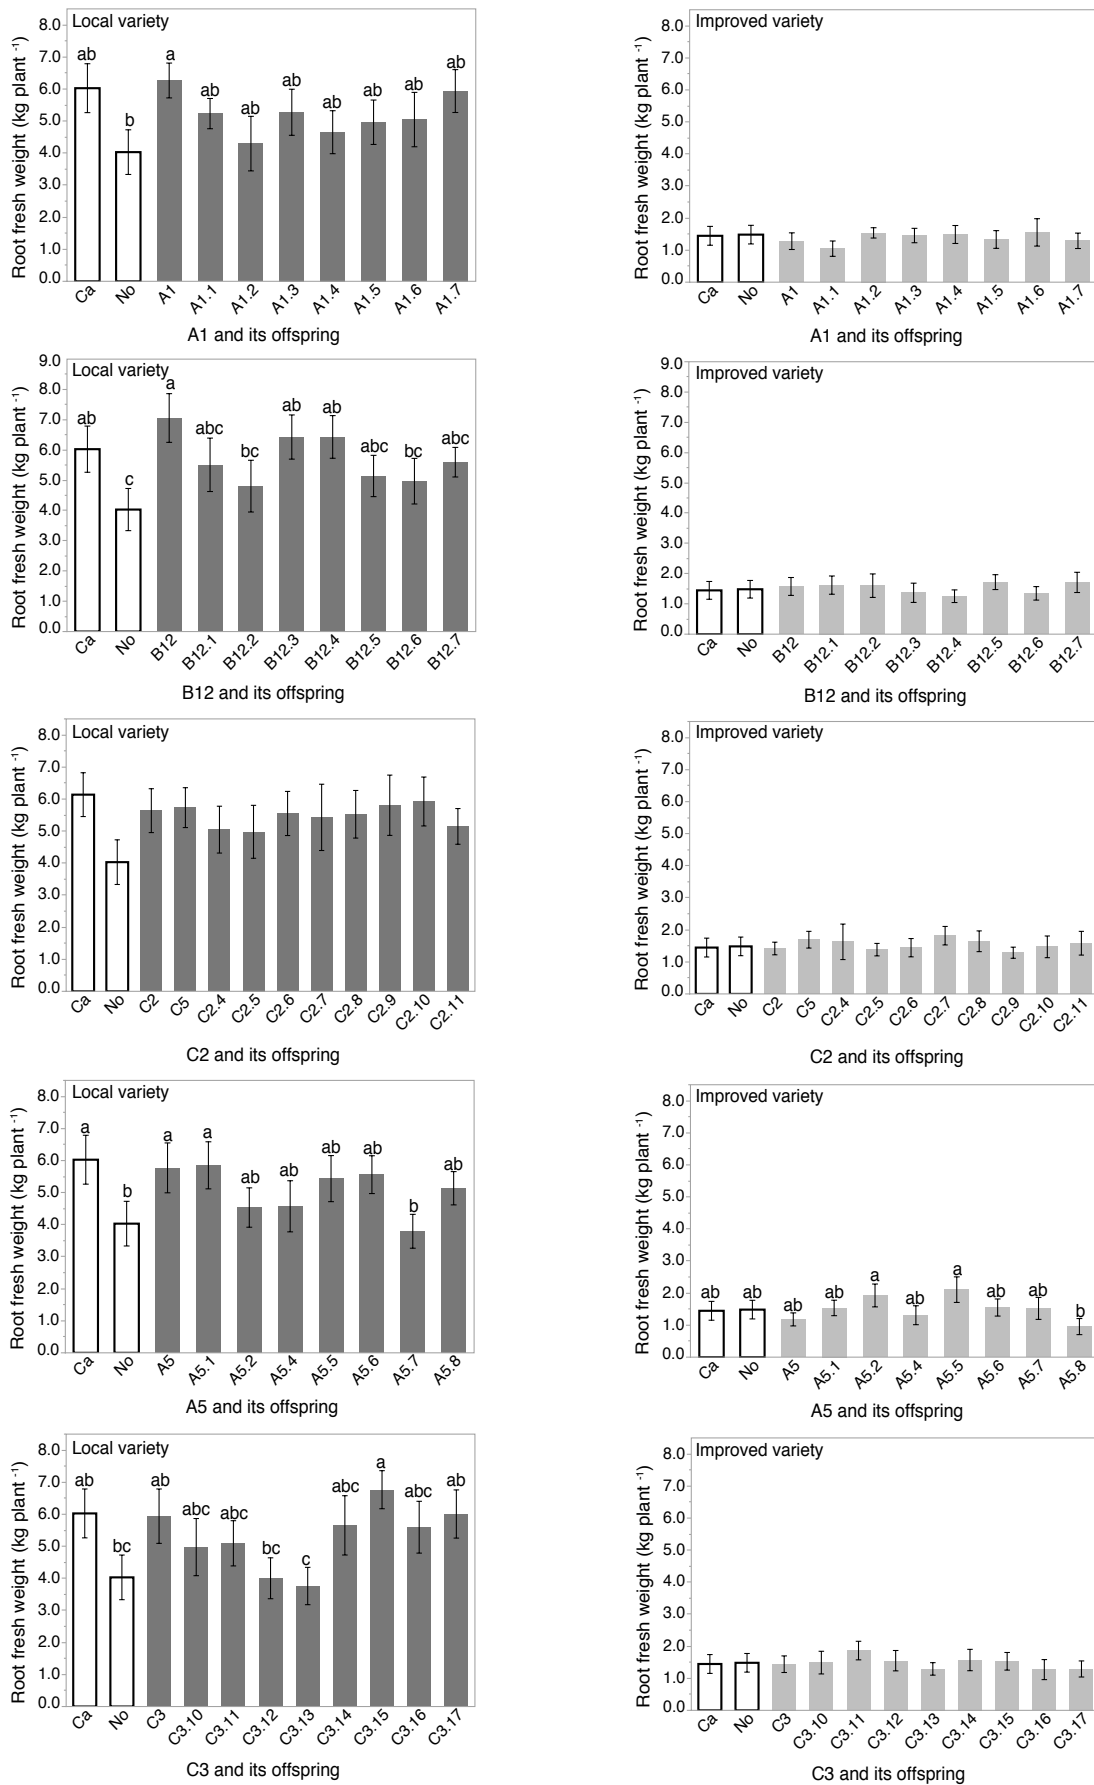

Supplementary figure 7. Root fresh weight of local cassava variety (Mwanaminzi and improved variety (Mkombozi) inoculated with 5 parental *R. irregularis* isolates and their offspring in Kijuka. Error bars represent  $\pm 1$  S.E. Different letters above bars represent significant differences at  $P \leq 0.05$ .
