# Supplementary material for: Using variation in arbuscular mycorrhizal fungi to drive the productivity of the food security crop cassava
Source: bioRxiv or medRxiv preprint supplement (doi:10.1101/830547), 2019-11-05
Supplement: Supplementary file [file media-10.pdf]

(a) Ukwala-Kawayo (Kenya)

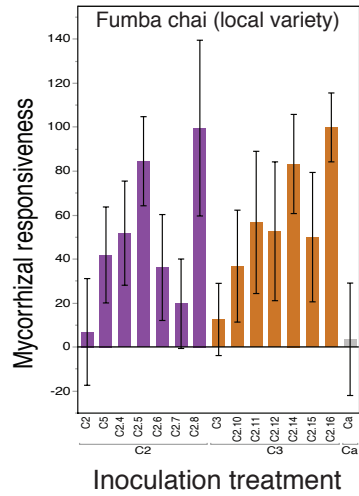

(b)

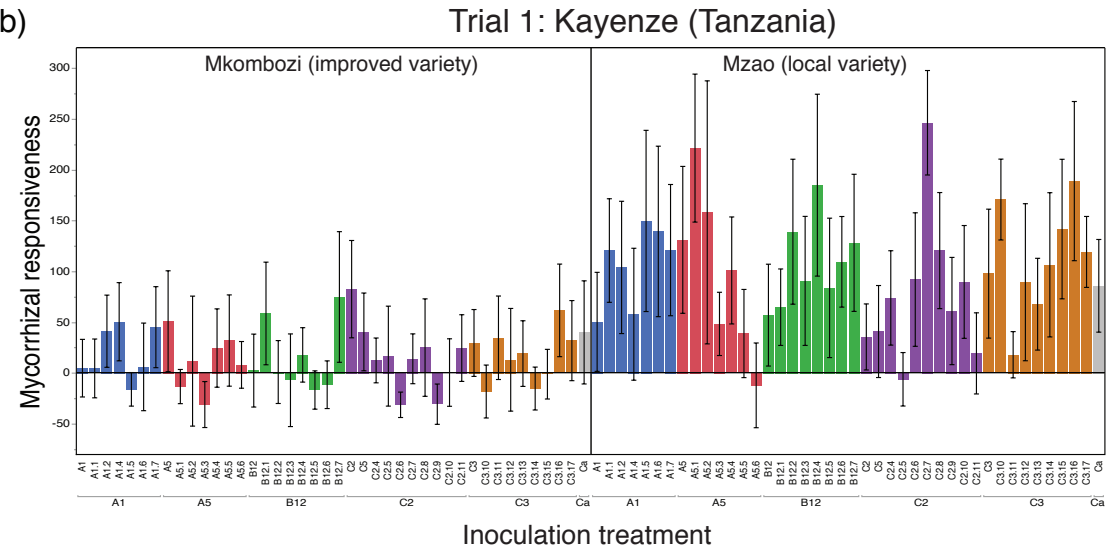

(c)

Kijuka (Tanzania)

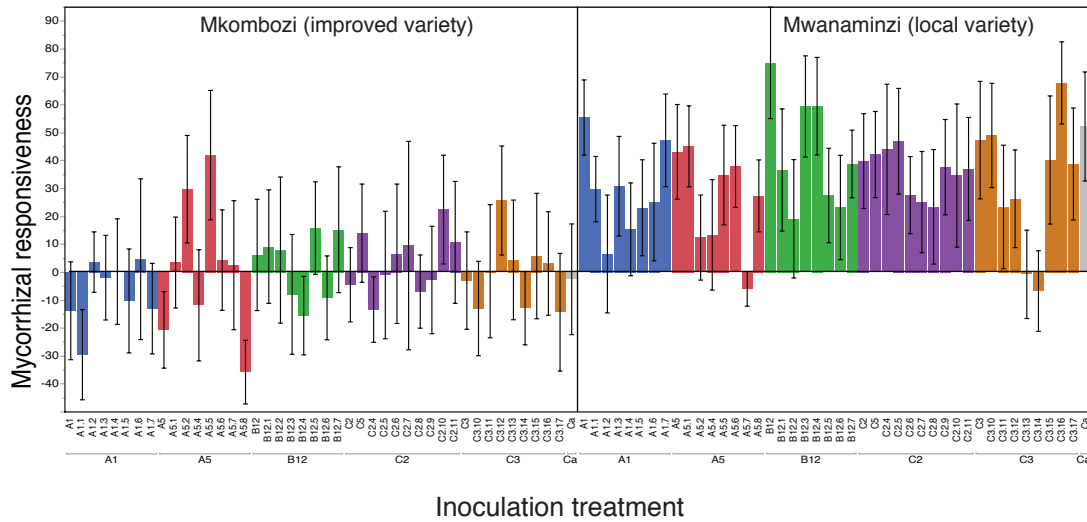

(d)

Trial 2: Kayenze (Tanzania)

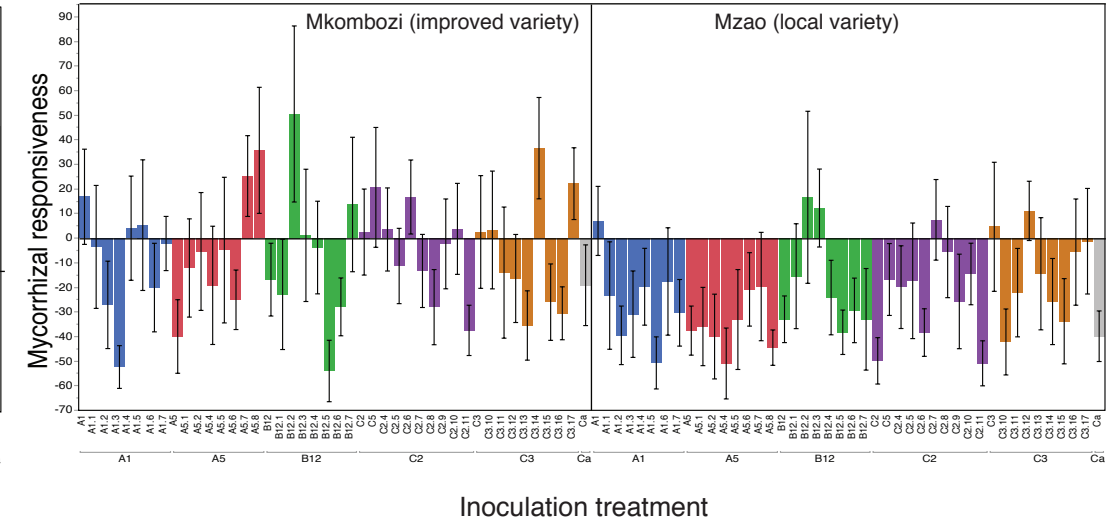

Supplementary figure 9. Mycorrhizal responsiveness of root weight of local and improved cassava varieties to inoculation with parental *R. irregularis* isolates and their progeny at one location in Kenya and two locations in Tanzania. The same colour bars represent inoculation with a given parental isolate and its progeny. Bars represent  $\pm 1$  S.E.
